# Supplementary material
Source: PubMed Central journal article supplement (PMC3571298)
Supplement: EC.00272-12_zek999094053so1.pdf [file EC.00272-12_zek999094053so1.pdf]

## Supplemental material

### Supporting tables

**Table S1.** Sequences of all oligonucleotides used in this work.

#### Primer for plasmid constructions

5'3'-sequence

|            |                                                           |
|------------|-----------------------------------------------------------|
| <b>P1</b>  | ACCACGCATGCTTCGGTATACGACGGTTGGCAATCAATGTC                 |
| <b>P2</b>  | TAGGAACTTCCCATACATATGTTCTGCCGGTCGCAGTATGG                 |
| <b>P3</b>  | AGGAACTTCGCGGCCGCGGCCGCCATACTCTCCCTGGGCTTTC               |
| <b>P4</b>  | AATACAGCGGCCGTTGTTAACGGCACTGATATTGCGCAGTC                 |
| <b>P5</b>  | AGGAACTTCGCGGCCGTTTAAACTGTAGTTCGCGTTTCGGGAC               |
| <b>P6</b>  | AATACAGCGGCCGTTATTTAAATGCCATCACATGGTTGGATAG               |
| <b>P7</b>  | ACCACGCATGCTTCGGTATACGAAGGCGTGGATATTTACCG                 |
| <b>P8</b>  | TAGGAACTTCCCATACATATGTTTTGATTTGTGAGTGGTGG                 |
| <b>P9</b>  | GCGGCCGCTCACAGTATTGAATAATG                                |
| <b>P10</b> | GTAAACCCAAGAACTGGAGTGAGGTC                                |
| <b>P11</b> | CCATGGGAATGCCACACGGCTTCGAC                                |
| <b>P12</b> | CCATGGCCCCGCTTCTTCCCCTTC                                  |
| <b>P13</b> | GTAACGCCAGGGTTTTCCCAGTCACGACGATAGCCGGCGCCAACCCTGGGCTTT    |
| <b>P14</b> | CTACATGAGCATGCCCTGCCCTGATGTCAAGTGGGATTCCCTGGACGACC        |
| <b>P15</b> | TCAGGGGCAGGGCATGCTCATGTAG                                 |
| <b>P16</b> | AACTGATATTGAAGGAGCATTTTTT                                 |
| <b>P17</b> | AAAAAATGTCCTTCAATATCAGTTTTTGTGACGTCCTCGATGTTCTG           |
| <b>P18</b> | GCGGATAACAATTTACACAGGAAACAGCATGTAACGCTCGGCGAAACTGACA<br>C |

#### Primer for gene amplifications

5'3'-sequence

|            |                                    |
|------------|------------------------------------|
| <b>P19</b> | GCTATTTTCATCTTCCCAGATCTG           |
| <b>P20</b> | GGTGTCGTATCTGGGCATATGC             |
| <b>P21</b> | CTCCATGGGAATGTACGCCGTCGAGGATAGACAT |
| <b>P22</b> | AGCCATGGTTACTCCGTCCTTGCGAATGGGGAT  |
| <b>P23</b> | ATGCCACACGGCTTCGACAAGC             |
| <b>P24</b> | CCATGGTCACCGCTTCTTCCCCT            |
| <b>P25</b> | ATGTTGAACAACACCAGTTCTGAC           |
| <b>P26</b> | TCATTGTGGCGTTCATTCCGGGAATC         |

#### Primer for the verification of knockout and recombination events

5'3'-sequence

|            |                            |
|------------|----------------------------|
| <b>P27</b> | GGATGAACAACACTGGCAGCTGGG   |
| <b>P28</b> | GTCCCGAGATGTCTGAGCTCC      |
| <b>P29</b> | CCGTCTACTGTTATGCCTTACA     |
| <b>P30</b> | GGGCTTTGTTGAGGTAAGTTATT    |
| <b>P31</b> | TGCACTTCATTATAGATGTCGACGC  |
| <b>P32</b> | GACCGTCTTTCGAGAGATCGGAG    |
| <b>P33</b> | CTACGGAGTACGGAGTACTC       |
| <b>P34</b> | ATCAGTGCCAGCTGTCTTCG       |
| <b>P35</b> | GCGCTCTACATGAGCATGCC       |
| <b>P36</b> | CAACTGATATTGAAGGAGCATTT    |
| <b>P37</b> | TCATGAGATGCCTGCAAGCAATTCG  |
| <b>P38</b> | ACCTTCTTAAGTTCGCCCTTCCCTCC |
| <b>P39</b> | GTGCGTTGACGTTGGTGACCTCCAG  |

**Primer for cDNA synthesis**

5'3'-sequence

- P40** GATTGGGGGTGGGTCAAC  
**P41** ATTACCGGTGGATACGCCAATC

**Primer for yeast two-hybrid analysis/BiFC**

5'3'-sequence

- P42** CCCGGGAATGGCCAACAGACCATCTCT  
**P43** GAGCTCTTATGTACTCGACGAAGGAGCTT  
**P44** AAGCTGATCTCAGAGGAGGACCTGCATATGGCCAACAGACCATCTCTCATGC  
**P45** CCTTGTCGGCATCCTTGGCGTCCTTGATCTCTTCGTATAGGTGGAAGCTC  
**P46** CTCAAATACCTGTCGAACGAGGTGGTTACCCCAAGCCTCCTATGAGTTCC  
**P47** GTTATGCTAGTTATGCGGCCGCTGCAGTTATGTACTCGACGGAGGAGCTTTC  
**P48** CACAGAATTCATGTACGCCGTCGAGGATAGACATCAT  
**P49** GGTGGATCCTTAATAGTCGCCTTCATCATCATCGT  
**P50** CAGAATTCATGCCACACGGCTTCGACAAGCT  
**P51** GTGGATCCTCACCGCCTCTTCTTCCCCTTC  
**P52** CGAATGAATTCATGTTGAACAACACCAGTTCTGA  
**P53** CGATTCTCGAGTCATTGTGGCGTTCATTTCGGGGAAT  
**P54** CCAGATTACGCTCATATGGCCATGGAGATGTTTACGAACGGGGATTCC  
**P55** GGAGCGGGTAGATTCCTTTCCGATAGCCATGGTACATTC  
**P56** GAATGTACCATGGCTATCGGAAAGGAATCTACCCGCTCC  
**P57** GCGGGGTTTTTCAGTATCTACGATTCATTTATTCCTCGACTGGTTTTTCG  
**P58** CTCAGAGGAGGACCTGCATATGGCCATGTTTACGAACGGGGATTTC  
**P59** GAGGCCCAAGGGGTTATGCTAGTTATTTATTCCTCGACTGGTTTTTCG  
**P60** CATGGAGCTCAGCGGCCGCATGTTGAACAACACCAGTTCTGACTTTG  
**P61** CAGGCCGGGCGGGCGGCCCTTGTGGCGTTCATTTCGGGGAATC

**Table S2.** Percentage identities and similarities (amino acids) of the velvet domains and full length velvet proteins from *P. chrysogenum* and *A. nidulans*

|                    | <b>Velvet domain</b> |                   | <b>Full length protein</b> |                   |
|--------------------|----------------------|-------------------|----------------------------|-------------------|
|                    | <b>Identity</b>      | <b>Similarity</b> | <b>Identity</b>            | <b>Similarity</b> |
| <b>PcVelA/VeA</b>  | 68 %                 | 79 %              | 45 %                       | 56 %              |
| <b>PcVelB/VelB</b> | 80 %                 | 86 %              | 63 %                       | 68 %              |
| <b>PcVelC/VelC</b> | 58 %                 | 68 %              | 38 %                       | 48 %              |
| <b>PcVosA/VosA</b> | 54 %                 | 61 %              | 50 %                       | 60 %              |

## Supporting Figures

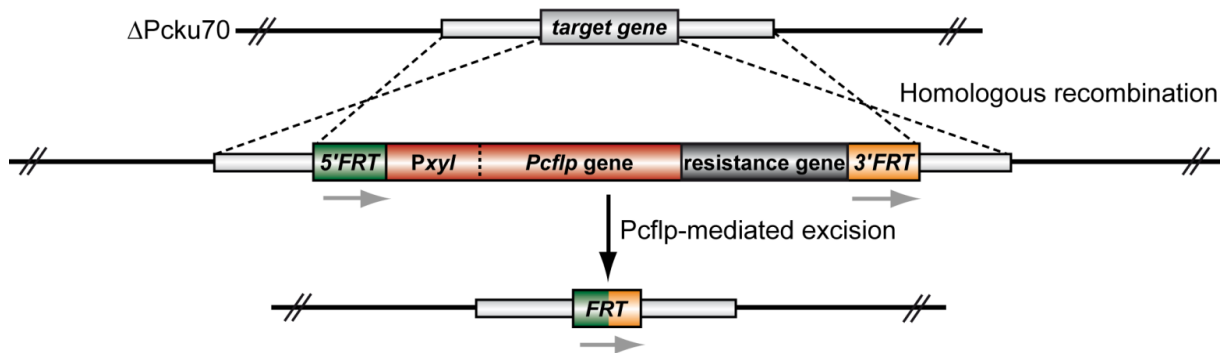

**Fig. S1.** Use of the flipper cassette to generate knockout strains by homologous recombination. As a resistance marker either *nat1* or *ble* was used (specified in the text). *Pxyl*: xylose-inducible promoter; *FRT*: Flippase recognition target; *Pcflp*: site-specific recombinase gene.

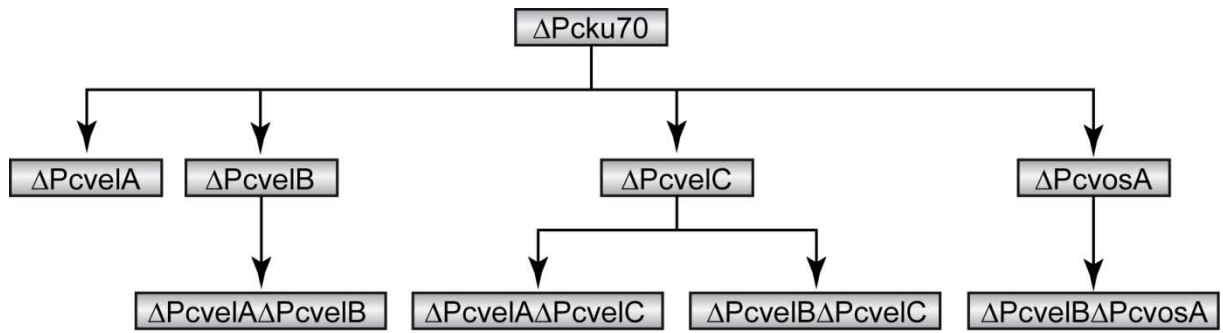

**Fig. S2.** Genealogy of all knockout strains used in this study. As reference,  $\Delta Pcku70$  was used for homologous recombination.

```

PcVelA : QLTAKLSVMQOPEERARAGGAKSSADRRF---VDPPPVELRIFESDPANDTQKTDITFAYNANFFLYATLETARPIAHGRVGGP----- : 83
VeA : -----MQQPKARAGGQESKSHTDRRF---VDPPPVELNIFESDPHDDSNKTDITFVYNANFFLFATLEPERPIATGKLMTN----- : 75
PcVelB : GRSSLSIQVVOQPEERARMGGEEDKDRRPITPEPCRLIVRDAQTKKEDINEITDSFYVLTVDLWNADGTSEVNLVKH----- : 77
VelB : GRISLSIQVVOQPEERARMGGEEDKDRRPITPEPCRLIVKDAQTKQKQVINDLSDFSYVVMADLWNADGTSEVNLVKH----- : 77
PcVelC : --RHLHTRQOPLAARAGGAEEDRRRPVDEPPIVQILLTDFDSSNCEBDRDLLQDPRFTVGCLLFPVSPSLPYAEPTEAHSRERDQERDQDRDGNDRERERE : 100
VelC : --RHLHTRQOPLAARAGGAEEDRRRPVDEPPIVQILLTDFDSSNCEBDRSILQDPRFTVGCLLFPVVRNPSYIIPGSGSGAGSSDNTNSNDKSRHESMSSYSQ : 100
PcVosA : SSDLDLIRQOPEERARVAGGKEKKEERVPVA----- : 31
VosA : SDDDELIVRQOPEERARVAGGKEKKEERVREDEKRELTWGDQFAERKPVDPPIVQIIRVREEGTYLAHLYDAQEDAPASIP----- : 76

PcVelA : -----QSCPVLKGVFVAGVAYLDRPSQ-----AGYFIIPDLSVRHSGRYRISSHHY : 129
VeA : -----QGSPVLKGVFVAGVAYLDKPNR-----AGYFIIPDLSVRNNGSYRFSHHEF : 121
PcVelB : -----VTGGPGGMFTRNLKCSLSAFAFRLTDPDKKI-----GWVFLQDLSVRTEGIFRLKMSFV : 132
VelB : -----VTPGPGGMFTRNLKCSLSAFAFRLYDTEFKI-----GWVFLQDLSVRTEGIFRLKMSFV : 132
PcVelC : HERERERERETDGVARTDDNFSTPLLSGKAFMSFFVVDADPPNSAPAHPSISDPHISNPPHHVYNHAASR--LHQPATFFIADLSIRSAGLYRLOQRHM : 200
VelC : LGINLEDSHATG-----QSTPLLSGKAFVSPFFVDEEPPNTAPAHPSSTDDSTYDASPRVTVTHFRNRRLPKPPACFFIADLSVRTAGLYRLOQRHM : 194
PcVosA : -----PSTALACTLVSLHRLKDVNDSD-----GGFFVIGDLSVRTEGIFRLKMSHF : 78
VosA : -----PSTALACTLVSLHRLKDVNDSD-----GGFFVIGDLSVRTEGIFRLKMSHF : 123

PcVelA : EEIKDAKDADKSTLPLNQIPLSATSCKGIPQAFHFRLEWKSVEFTVYSARKKFPGLATSTLSLRIIADQGCRRVIRRDV : 210
VeA : EQIKDPKDATEG--TQPMSPVPVPGKLSS---PQEFHFRLEWISNPFIVYSARKKFPGLTSTPISRMIAEQGCRRVIRRDV : 197
PcVelB : DVGTSTETSNG-----APVINHGTAPEVLSVSEPEQVFSARKKFPGVIESTLQSKCFADQGIKTPIRKDG : 197
VelB : NVGKSVSDLPQS-----DIAEVINKGTAPILASTFSEPEQVFSARKKFPGVIESTPLSKVFANQGIKTPIRKDG : 200
PcVelC : NWGSVEDTGQS-----MPIIAQAWSDEBRVYPAKDFPGMRDSSILAEGLKELCFVELKTRGH : 257
VelC : NWGSIEDTGQS-----MPIIAEWSDEBRVYPAKDFPGMRDSSILAEGLKELCFVELKTRGH : 251
PcVosA : EMRKDR-----WSYIKTVISERTVSPPEPFGMESTHLERSFADQGVKIRIRKEP : 130
VosA : EMRKEDEELTG-----NSSVRTDWEVFKSIVSERTVSPPEPFGMAESTHLERSFADQGVKIRIRKEP : 187

```

**Fig. S3.** Amino acid sequence comparison of the conserved velvet domain of PcVelA (aa 27-236), PcVelB (aa 49-125, 208-327), PcVelC (aa 220-476), and PcVosA (aa 6-135) as shown in Fig. 1. For comparison, the sequence of the corresponding *A. nidulans* homologs VeA (aa 1-197), VelB (aa 56-132, aa 226-348), VelC (aa 252-502), and VosA (aa 17-203) are given.

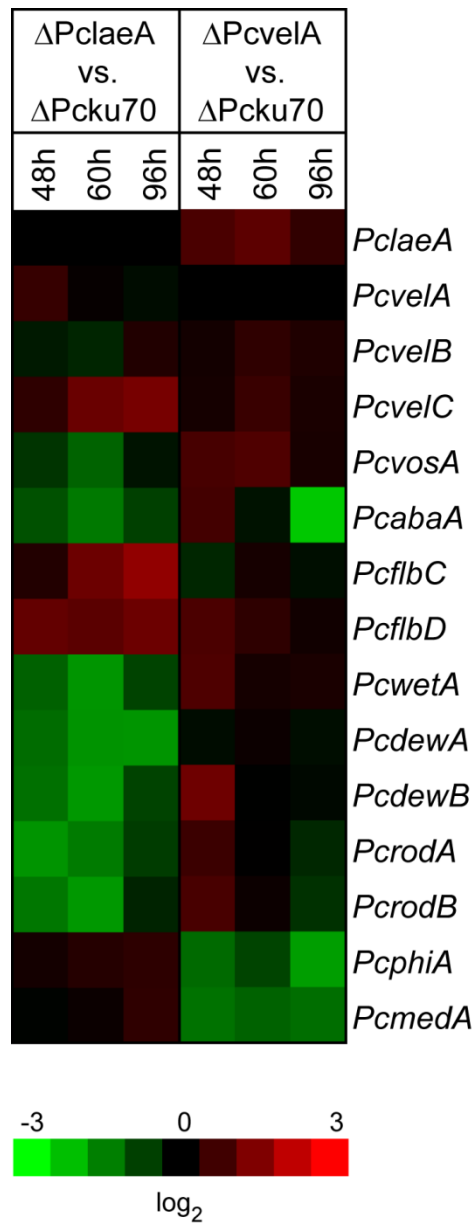

**Fig. S4.** Microarray analyses of selected *PclaeA*- and *PcvelA*-dependent genes. Heatmaps of genes from the velvet complex and developmental genes are shown. Red indicates genes that are upregulated in the corresponding mutant compared to the reference strain  $\Delta Pcku70$ ; green marks those that are downregulated compared to the reference strain. All genes and their products are mentioned in the text. The color of each square represents a  $\log_2$ -fold change in expression at the given time point.

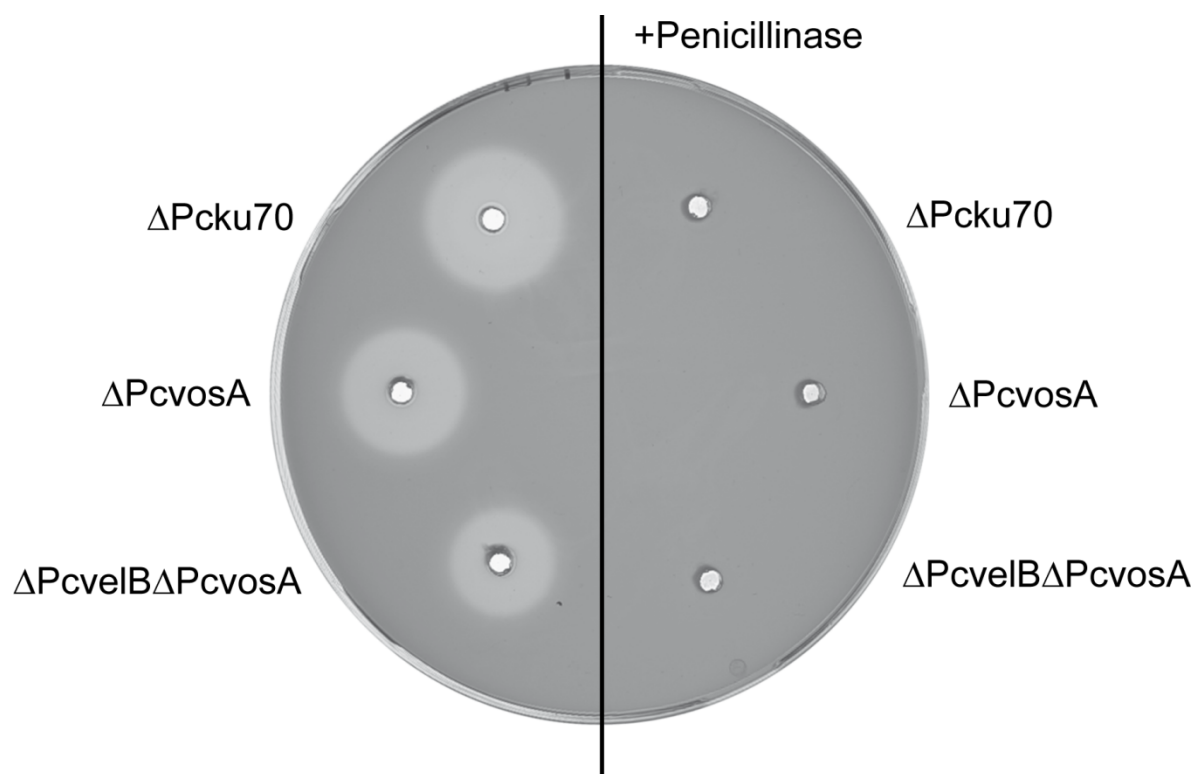

**Fig. S5.** Penicillinase assay. To confirm that growth inhibition of the indicator organism *S. aureus* was due to penicillin production, penicillinase was added to the supernatant of selected strains.



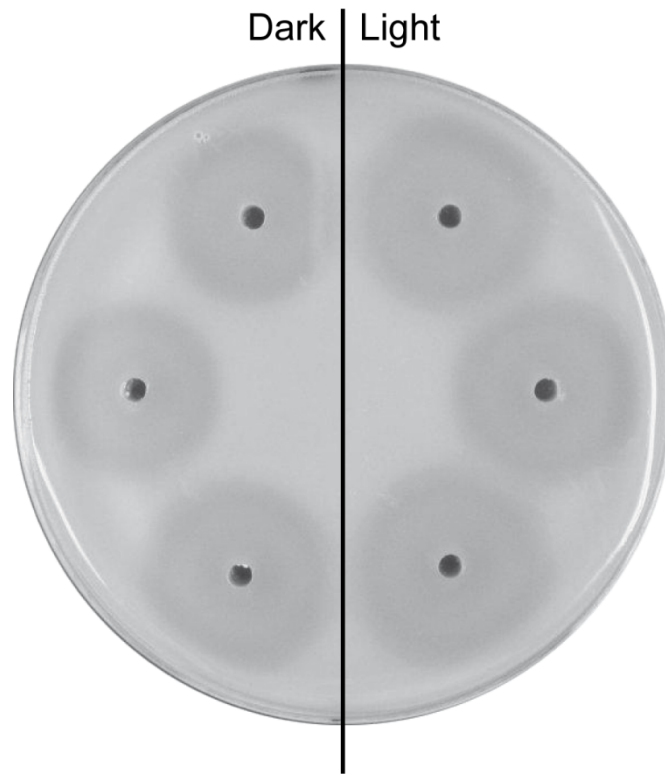

**Fig. S6.** Penicillin production under light and dark conditions. The reference strain P2niaD18 was grown in triplicate for 72 h in shaking culture with either constant light or constant dark conditions. A halo assay indicates the amount of penicillin produced under both conditions.
